# Supplementary material for: Cloud Products from the Earth Polychromatic Imaging Camera (EPIC): Algorithms and Initial Evaluaiton
Source: Copernicus journal article supplement (doi:10.5194/amt-2018-316), 2018-11-13
Supplement: Supplementary file [file amt-2018-316-AC2-supplement.pdf]

## Response to RC1

Manuscript amt-2018-316: “Cloud Products from the Earth Polychromatic Imaging Camera (EPIC): Algorithms and Initial Evaluation”

By:

Yuekui Yang, Kerry Meyer, Galina Wind, Yaping Zhou, Alexander Marshak, Steven Platnick, Qilong Min, Anthony B. Davis, Joanna Joiner, Alexander Vasilkov, David Duda, Wenying Su

### RC1 comments:

*This manuscript presents a simple algorithm description for deriving cloud properties from the EPIC camera located on the DSCOVR satellite, and makes initial comparisons to independent observations derived from combinations of LEO/GEO data. The cloud properties reported include a cloud mask, cloud top height (CTH) & temperature (CTT), effective cloud fraction (ECF), and cloud optical thickness (COT). In the case of COT, both liquid and ice phase COT retrievals are reported. A total of four weeks of data are investigated, with one week drawn from each of the seasons.*

*EPIC is making a first of a kind observation from Lagrange point 1 and this study certainly warrants publication. This is a short and concise paper that is well organized and to the point. The only problem is a lack of background description on how the data is obtained in the instrument and re-gridded and then used for Level 2 cloud retrievals. If this has been described at length in previous papers or ATBDs, this information needs to be conveyed in this paper because it is not clear how this unique viewing perspective of Earth and 7-minute long data acquisition cycle are reconciled.*

*To be specific, the Earth rotates 15 degrees in an hour, which translates to 1.75 degrees in 7 minutes. If the channels are acquired in sequence (is this the case? And If so, does it start with 317 nm and end with 780 nm?), the Earth advances 0.175 degrees in 0.7 minutes (42 seconds) during one channel acquisition, which is about 19.4 km of Earth rotation at the equator. Therefore, from channel to channel, the Earth rotates about 2.5 pixels in distance at nadir. How is this dealt with? The authors need to have some added discussion on this, or clarify that this is incorrect and that the instrument operates in a different manner.*

### Response:

We thank the reviewer for the insightful comments. Rotation of the Earth is indeed an issue that the EPIC L1B algorithm has to take into account when projecting all the different channels onto a common grid. Even after the reprojection, the problem still exists for cloud retrievals, because of the potential cloud field change due to the latency between imaging different wavelengths. As mentioned in the manuscript, we selected the five channels that are close to each other in imaging time in order to mitigate the problem. We added the following paragraphs to address the issues raised by the reviewer:

“The focal plane of the EPIC system is a 2048 x 2048 pixel CCD array. The point spread function of the CCD array has a full width at half maximum (FWHM) of  $\sim 1.34$  pixels. Images for the 10 spectral channels are obtained using a 10-color filter wheel assembly and shutter, the operation of which takes about 7 minutes to acquire a complete set of observations. As shown in Figure 1, the observation starts with the 443nm channel, followed by the 551nm, 688nm, 680nm, 764nm, 780nm, 388nm, 340nm, 325nm, and 317nm channels. The time difference between one channel and the next consists of readout, exposure, and filter rotation time. Limited by data transmission capability, only the 443 nm channel image is downlinked at its the original size; the rest are all reduced to 1024 x 1024 pixels through onboard processing and then interpolated back to the full size of 2048 x 2048 after being downlinked. As can be seen from Figure 1, the observation time difference between one channel and the next is usually half a minute, except between the 443nm and 551nm, which is  $\sim 3$  minutes. At full resolution, the pixel size of EPIC observations is  $\sim 8$ km at nadir. For view zenith angle (VZA)  $> 0$ , the EPIC pixels become elliptical, where the longer axis increases by a factor of about  $1/\cos(\text{VZA})$  and the shorter axis remains  $\sim 8$ km.

Due to the latency between imaging different wavelengths and the rotation of the Earth, the regions covered by the images of the 10 EPIC spectral channels are not exactly the same. For algorithm development and research, all 10 spectral channels are projected to a common grid in the Level-1B (L1B) radiance product. The projection procedure includes (see details in Marshak et al. 2018): 1) mapping the images to a 3D model of the Earth in order to calculate the geolocation of each pixel; and 2) projecting and regridding each image onto the common reference grid. ”

*Table 1 states that the cloud products are obtained at the “native pixel size”, which is about 8 km at nadir. How much bigger do the pixels get at the edge of the Earth disk? And how is the “re-gridding” consistent with keeping a native 8 km resolution at nadir?*

## **Response:**

Thanks for pointing this out. As mentioned in our answer to the previous question, At full resolution, the pixel size of EPIC observations is  $\sim 8$ km at nadir. For view zenith angle (VZA)  $> 0$ , the EPIC pixels become elliptical, where the longer axis increases by a factor of about  $1/\cos(\text{VZA})$  and the shorter axis remains  $\sim 8$ km. We tried to separate the term “resolution” and “pixel size”, because after the onboard 2x2 averaging for the nine channels other than 443 nm, the resolution becomes  $\sim 18$ km at nadir.

## **Other comments**

*Throughout the manuscript “etc.” is used in place of quantitative information. These instances must spell out exactly what is intended by “etc.” because in all cases it is not clear at all what is meant.*

**Response:**

Changes are made to address this issue. Occurrences of “etc.” are removed for the following places, where we think the possibilities are enumerated: P1, Line 15; P2, Line 25; and P10, Line 5. Other occurrences of “etc.” are kept, because of unknown or too many possibilities, such as the number of potential applications of cloud products.

*p. 1 line 27: . . .capability not previously available. . .*

**Response:** done

*p. 1 line 28: delete “in the past”*

**Response:** done

*p. 2 line 24: . . .retrieval are run. . .*

**Response:** done

*p. 4 line 2: what is the impact of the 6 m/s assumption? Can the authors add an error estimate(s) based on known climatologies of wind speeds within and outside of storms in different latitude bands?*

**Response:**

This is an error on our part. For the current version, the thresholds over ocean surfaces are actually empirically derived. We added text to make this clear. Now the paragraph reads as follows:

“Similar to the 388 nm test over land, a Rayleigh correction is also applied to both the 680 nm and 780 nm BRFs. Thresholds are derived empirically. BRF values  $T_{680} = 0.11$  and  $T_{780} = 0.10$  are used to separate low confidence clear and low confidence cloudy scenes for the 680nm and 670nm channels, respectively.  $T_{680} \pm 0.03$  and  $T_{780} \pm 0.03$  are used as the high confidence thresholds for the two channels, respectively.”

*p. 4 line 4: relatively p. 7 lines 10-11: what is the size of the EPIC pixel PSF at half-max? Are they the same for all 10 channels and all elements of the CCD array?*

**Response:**

The size of the EPIC pixel PSF is about 1.34 pixels and is the same for all the ten channels. Text has been added to the manuscript to address this issue.

**References:**

Marshak, A., Herman, J., Szabo, A., Blank, K., Cede, A., Carn, S., Geogdzhayev, I., Huang, D., Huang, L-K, Knyazikhin, Y., Kowalewski, M., Krotkov, N., Lyapustin, A., McPeters, R., Meyer, K., Torres, O., and Yang, Y.: Earth observations from DSCOVR/EPIC instrument, *Bull. Amer. Meteor. Soc.* *99(9)*, 1829-1850. <https://doi.org/10.1175/BAMS-D-17-0223.1>, 2018.
